# Supplementary material for: Neuromodulatory connectivity defines the structure of a behavioral neural network
Source: eLife. 2017 Nov 22;6:e29797. doi: 10.7554/eLife.29797 (PMC5720592; doi:10.7554/eLife.29797)
Supplement: Figure 6—source data 1. [file elife-29797-fig6-data1.xlsx]

## Sheet: Sheet1
Source Data for Graph of Figure 6E
		Calcium Oscillation Frequencies Calcualted by Phase Finder (Hz)
	Rk	Prep1	Prep2	Prep3	Prep4	Prep5	Prep6	Prep7	Prep8		Average	Std Dev
	Phase 1	0.0234302	0.0154639	0.0124961	0.0281162	0.0121837	0.0173383	0.0133372	0.0160664		0.017304	0.00566218
	Phase 2	0.0216729	0.0301989	0.0135895	0.0135895	0.0155	0.0187441	0.0164011	0.0179631		0.0184574	0.00546281
	Phase 3	0.00859107	0.00520671	0.00468604	0.00390503	0.00322165	0.00362103	0.00223145	0.00468604		0.00451862	0.00189774
		Calcium Oscillation Frequencies Calcualted by Phase Finder (Hz)
	CCAP-R∩Vglut	Prep1	Prep2	Prep3	Prep4	Prep5	Prep6	Prep7			Average	Std Dev
	Phase 1	0.0109341	0.00937207	0.0124961	0.00859107	0.0140581	0.0105436	0.0215558			0.0125073	0.00439275
	Phase 2	0.0183837	0.0180042	0.0221285	0.0244167	0.0270749	0.0180042	0.015397			0.020487	0.00416729
	Phase 3	0.0124042	0.00441039	0.00790769	0.00874727	0.00689123	0.00468604	0.00609185			0.00730552	0.00274852
