# Supplementary figures and images for: Neuromodulatory connectivity defines the structure of a behavioral neural network
Source: eLife journal article supplement (doi:10.7554/elife.29797), 2017-11-22

# Figure 5—Figure Supplement 1

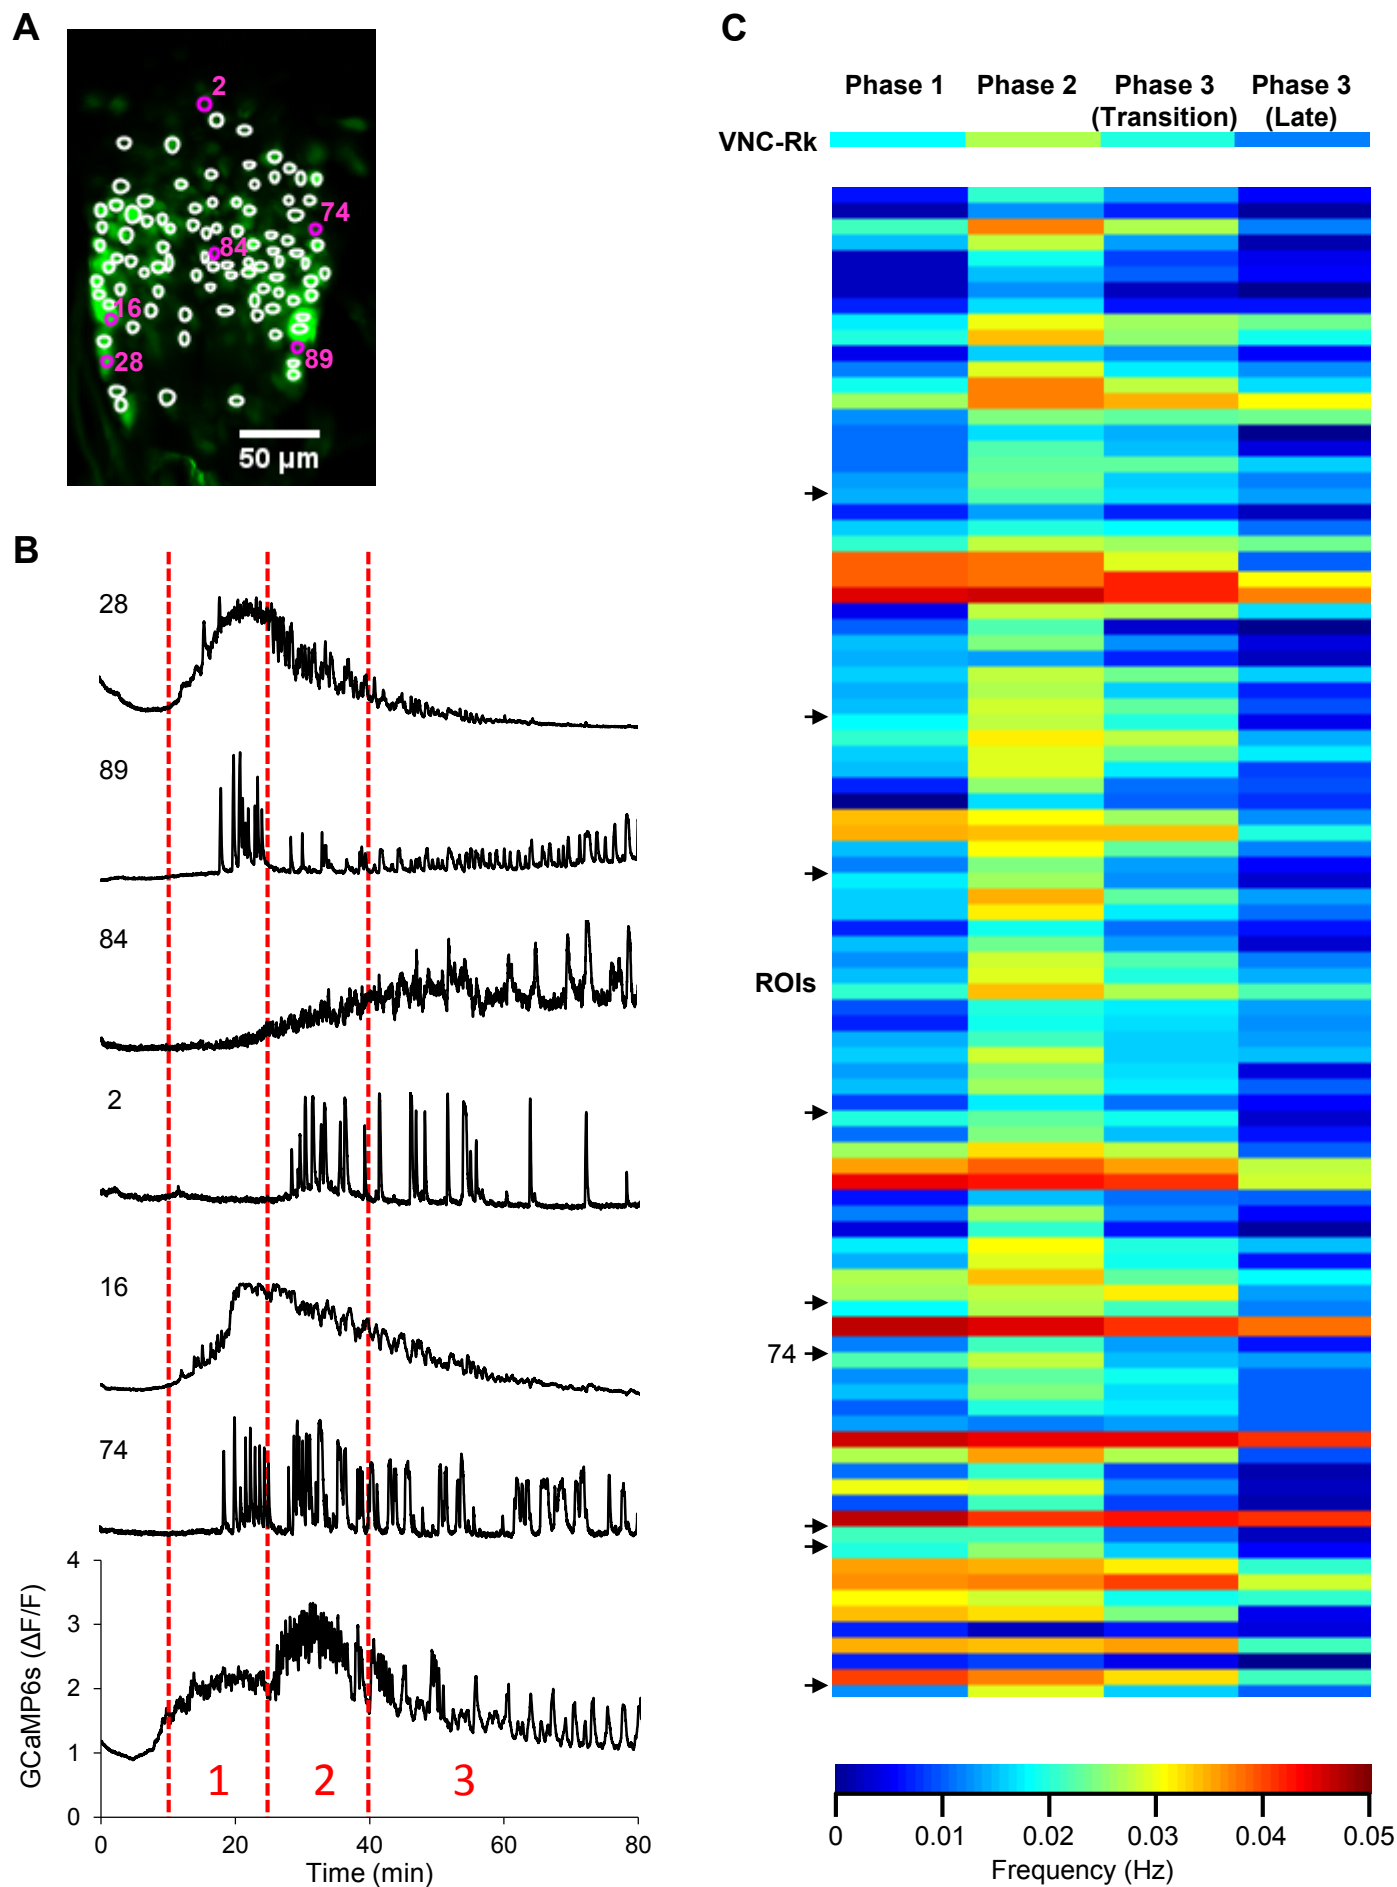

Supplement: supp [file elife-29797-supp-v1.zip]

# Figure 6—Figure Supplement 1

A

CCAPR-Gal4DBD  $\cap$   
ETHRA-p65AD

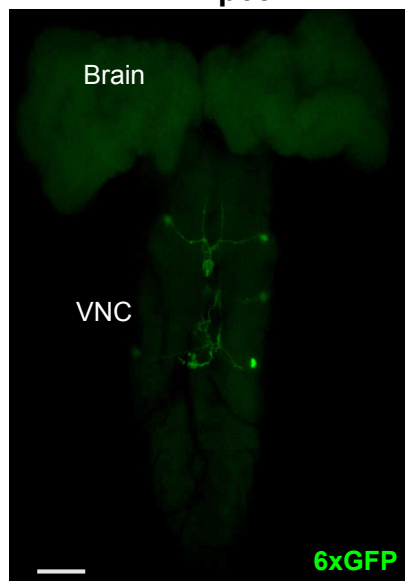

B

CCAPR-Gal4DBD  $\cap$   
ETHRB-p65AD

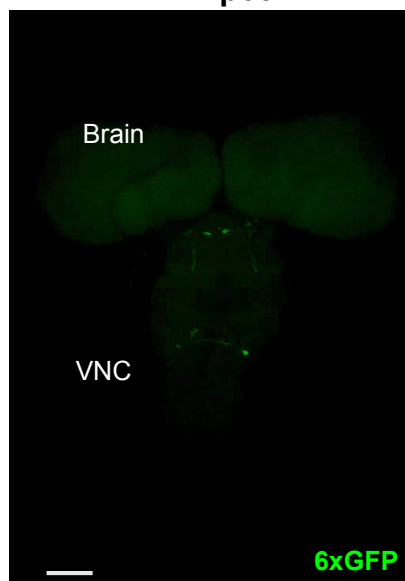

Supplement: supp [file elife-29797-supp-v1.zip]

# Figure 4—Figure Supplement 1

**A**

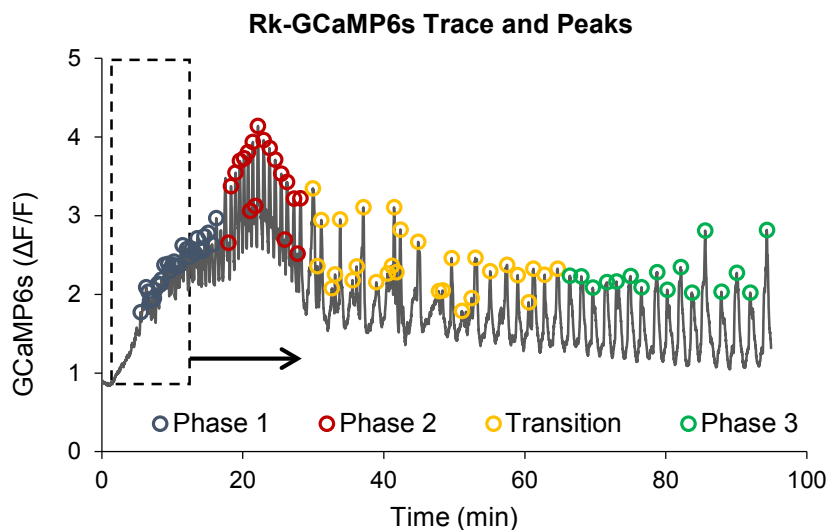

**B**

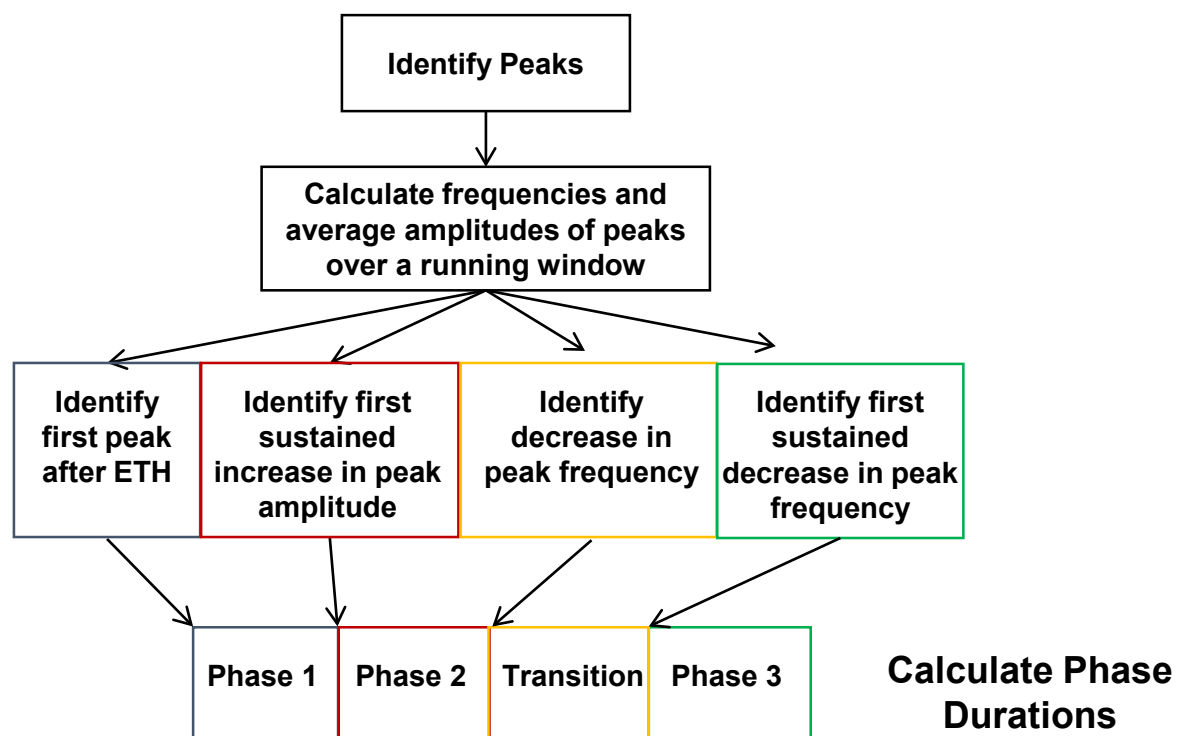

Supplement: supp [file elife-29797-supp-v1.zip]
